# Supplementary material for: Effects of Vitamin D Supplementation on COVID-19 Related Outcomes: A Systematic Review and Meta-Analysis
Source: MDPI journal article supplement (doi:10.3390/nu14102134), 2022-05-20
Supplement: s1 [file s1]

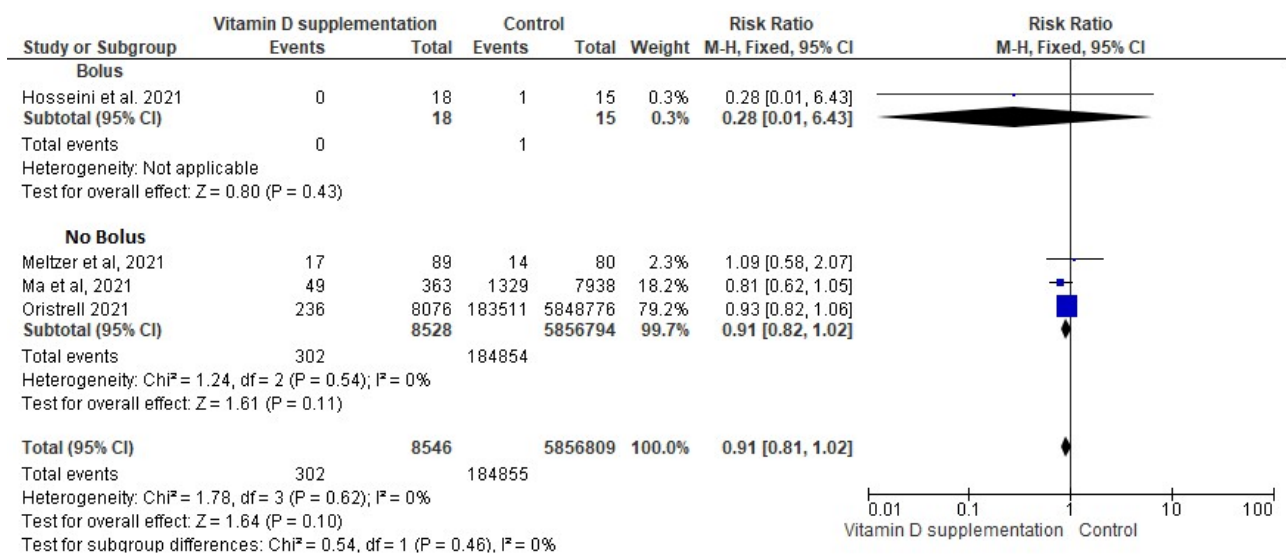

**Figure S1.** Forest plot of studies investigating the effect of supplementation with vitamin D on the risk of COVID-19 infection by vitamin D regimen (daily or weekly without bolus dosing versus regimen including at least one bolus of 30,000 IU or more). Values are presented as risk ratio with 95% CI determined with the use of Mantel-Haenszel fixed-effects models. Heterogeneity was quantified by  $I^2$  at a significance of  $P < 0.10$ .

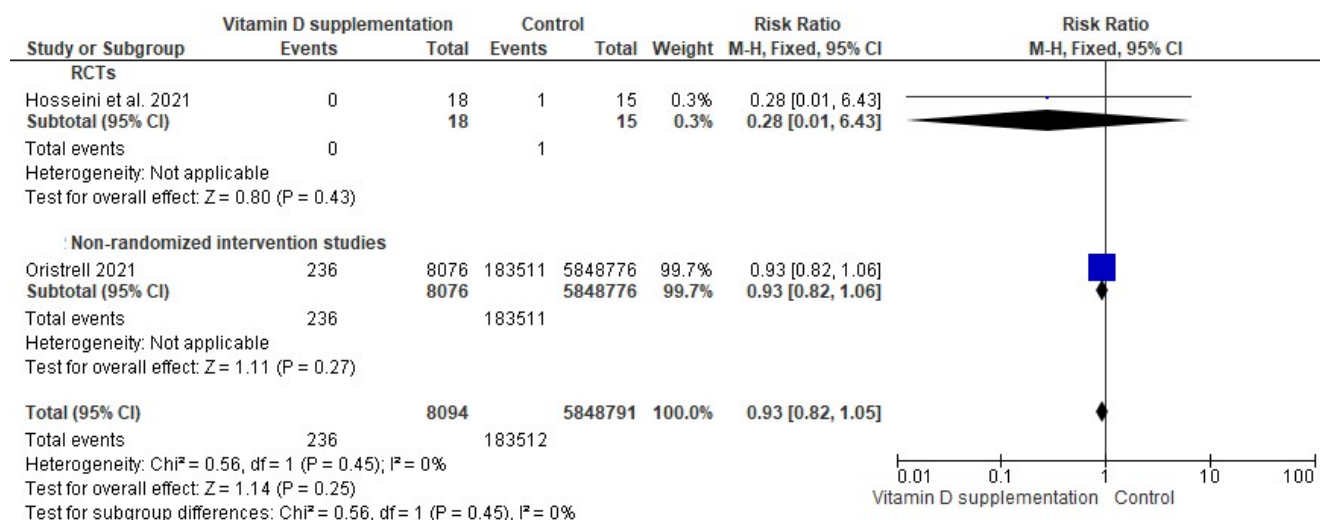

**Figure S2.** Sensitivity analysis of studies investigating the effects of supplementation with vitamin D on risk of COVID-19 infection. Only studies with a low risk of bias were included. Values are presented as risk ratio with 95% CI determined with the use of Mantel-Haenszel fixed-effects models. Heterogeneity was quantified by  $I^2$  at a significance of  $P < 0.10$ .

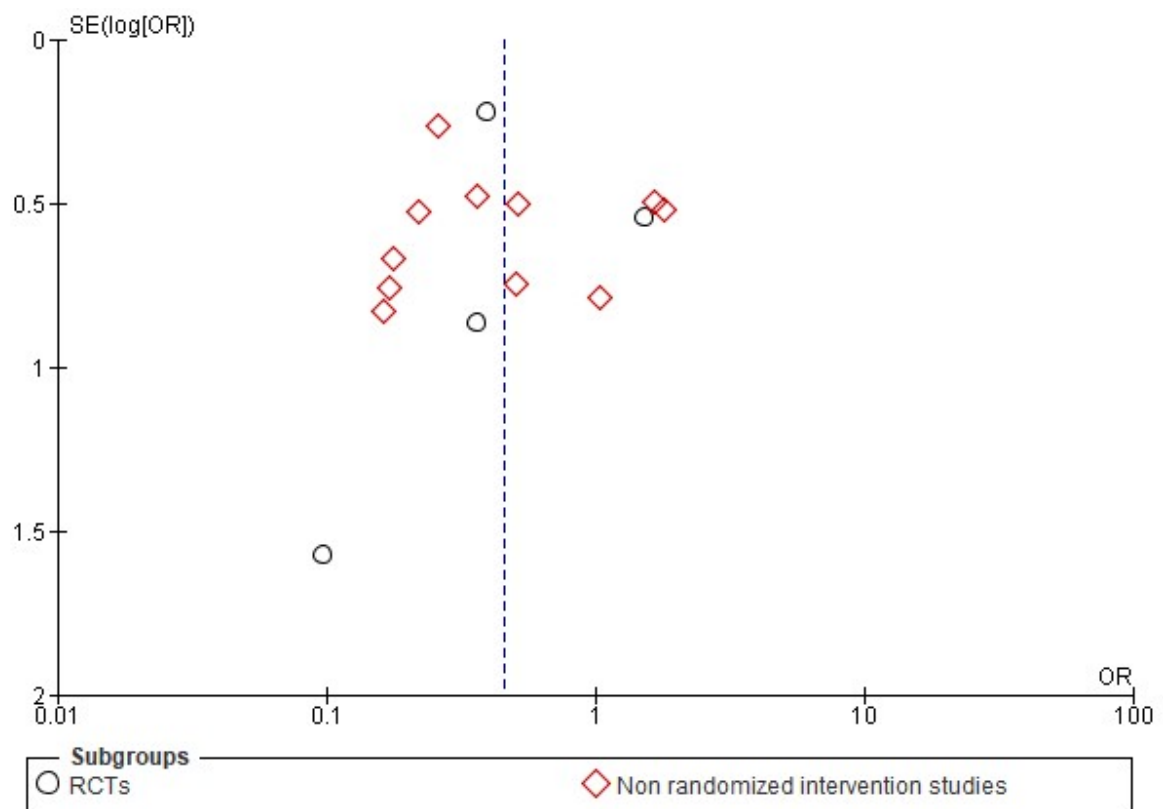

**Figure S3.** Funnel plot of studies on vitamin D and COVID-19 mortality in randomized clinical trials (circles) and non randomized intervention studies (diamonds)

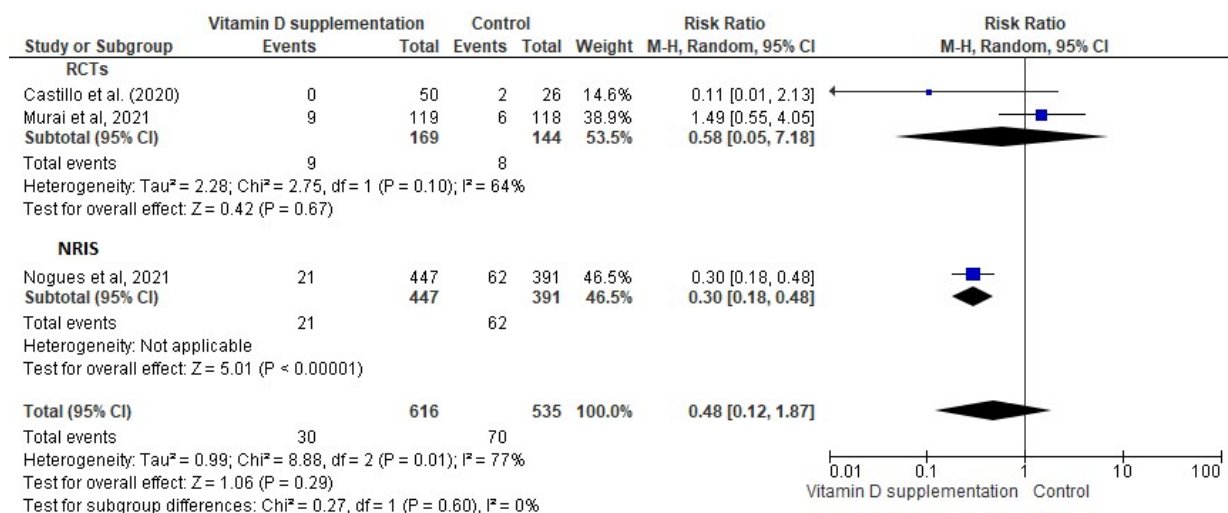

**Figure S4.** Sensitivity analysis of studies investigating the effects of supplementation with vitamin D on COVID-19 mortality rate. Only studies with a low risk of bias were included. Values are presented as risk ratio with 95% CI determined with the use of Mantel-Haenszel fixed-effects models. Heterogeneity was quantified by  $I^2$  at a significance of  $P < 0.10$ .

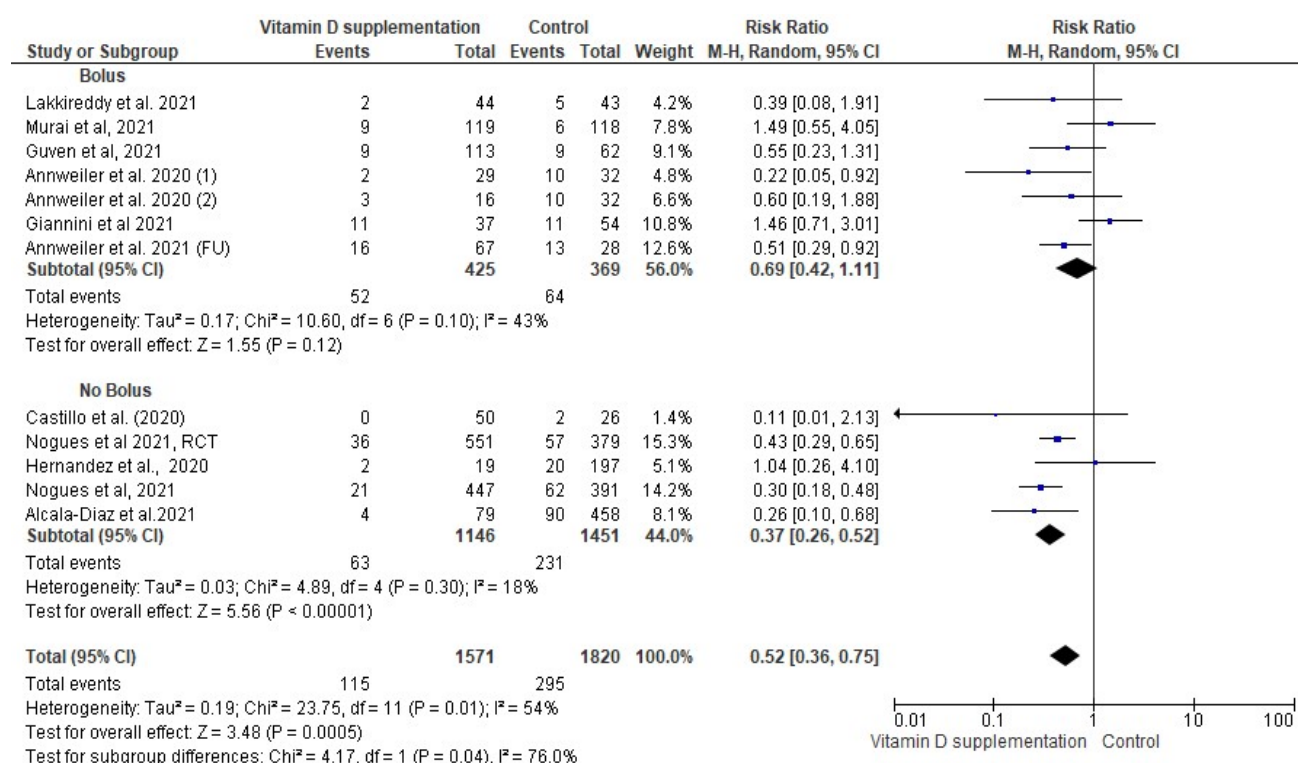

**Figure S5.** Forest plot of tertiary prevention studies investigating the effects of supplementation with vitamin D on COVID-19 mortality rate by vitamin D regimens (daily or weekly without bolus dosing versus a regimen including at least one bolus of at least 30,000 IU). Values are presented as risk ratio with 95% CI determined with the use of Mantel-Haenszel fixed-effects models. Heterogeneity was quantified by  $I^2$  at a significance of  $P < 0.10$ .

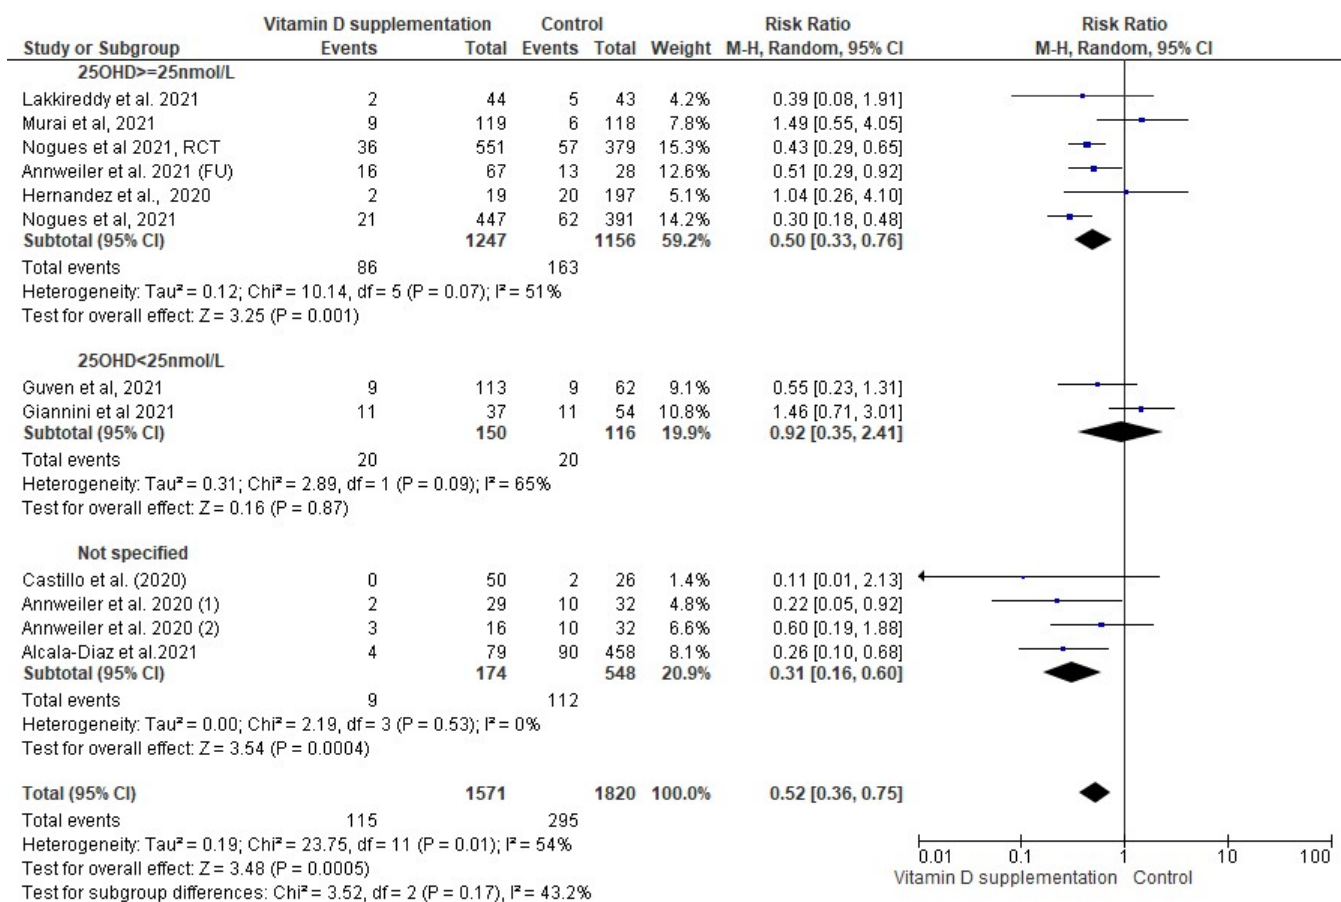

**Figure S6.** Forest plot of tertiary prevention studies investigating the effects of supplementation with vitamin D on COVID-19 mortality rate by baseline vitamin D status (serum 25-hydroxy level (25(OH)D $\geq$  25 nmol/L versus 25(OH)D< 25 nmol/L versus not specified). Values are presented as risk ratio with 95% CI determined with the use of Mantel-Haenszel fixed-effects models. Heterogeneity was quantified by  $I^2$  at a significance of  $P < 0.10$ .

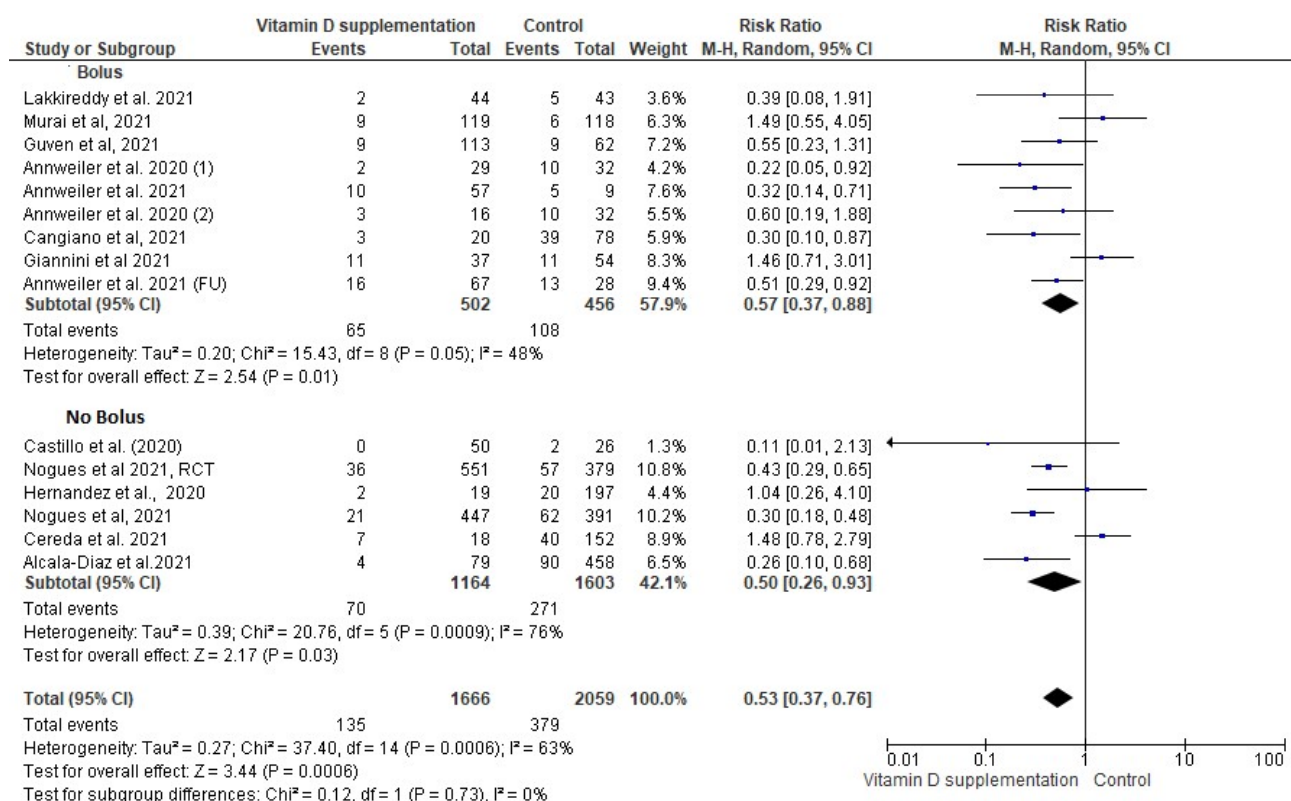

**Figure S7.** Forest plot of secondary and tertiary prevention studies investigating the effects of supplementation with vitamin D on COVID-19 mortality rate by vitamin D regimens (daily or weekly without bolus dosing versus a regimen including at least one bolus dose of at least 30,000 IU). Values are presented as risk ratio with 95% CI determined with the use of Mantel-Haenszel fixed-effects models. Heterogeneity was quantified by  $I^2$  at a significance of  $P < 0.10$ .

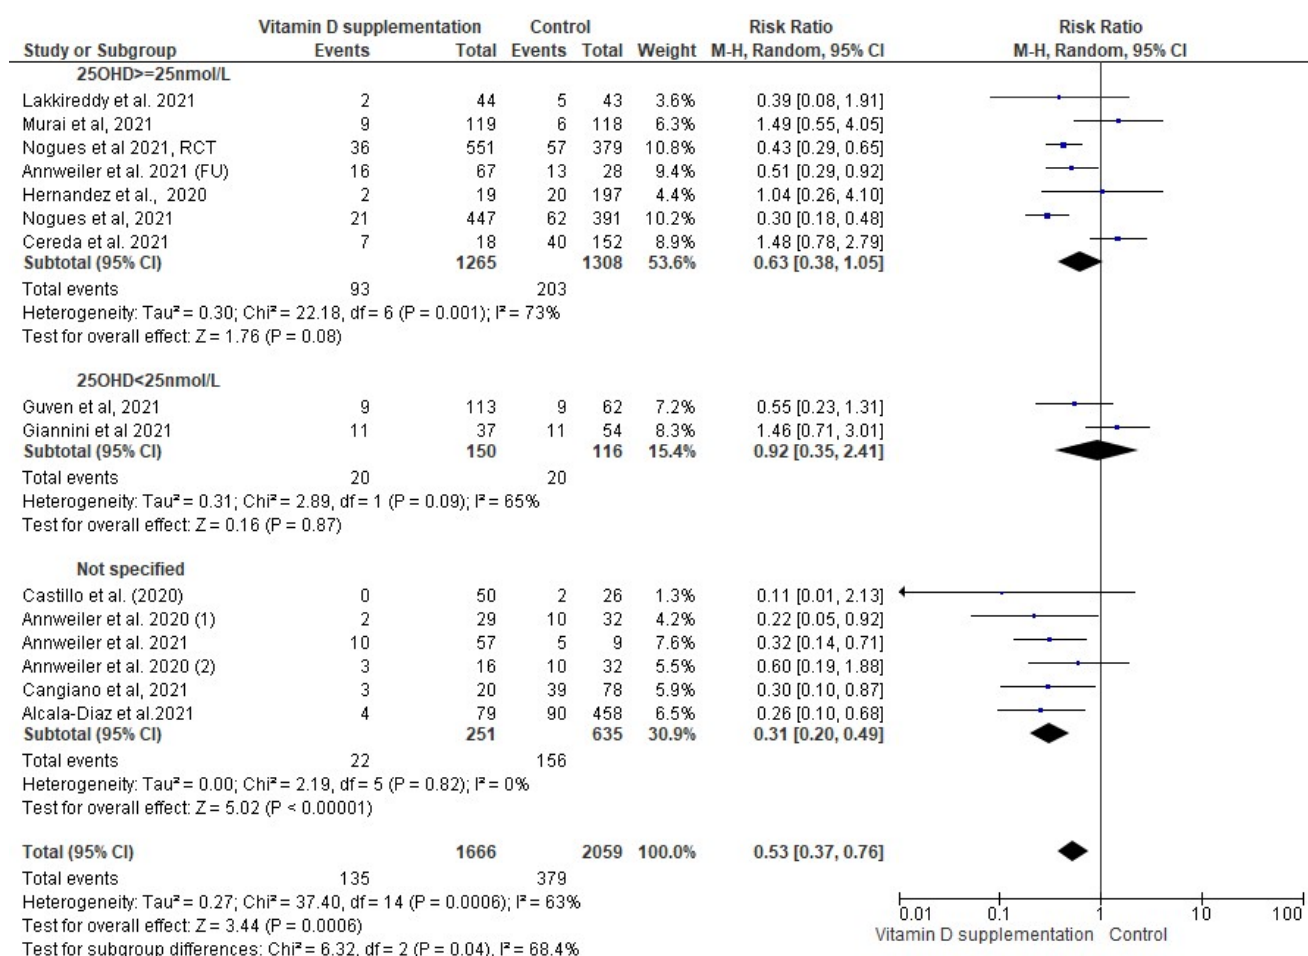

**Figure S8.** Forest plot of secondary and tertiary prevention studies investigating the effects of supplementation with vitamin D on COVID-19 mortality rate by baseline vitamin D status (serum 25-hydroxy level (25(OH)D $\geq$  25 nmol/L versus 25(OH)D $<$  25 nmol/L versus not specified). Values are presented as risk ratio with 95% CI determined with the use of Mantel-Haenszel fixed-effects models. Heterogeneity was quantified by  $I^2$  at a significance of  $P < 0.10$ .



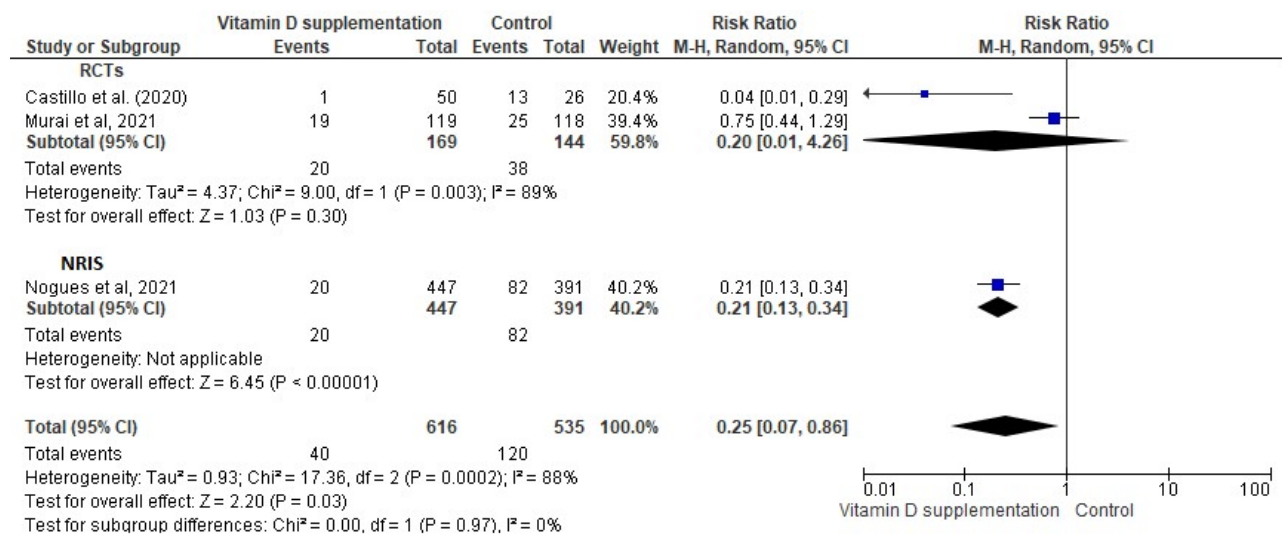

**Figure S9.** Sensitivity analysis of studies investigating the effects of supplementation with vitamin D on COVID-19 associated ICU admission rate. Only studies with a low risk of bias were included. Values are presented as risk ratio with 95% CI determined with the use of Mantel-Haenszel fixed-effects models. Heterogeneity was quantified by  $I^2$  at a significance of  $P < 0.10$ .

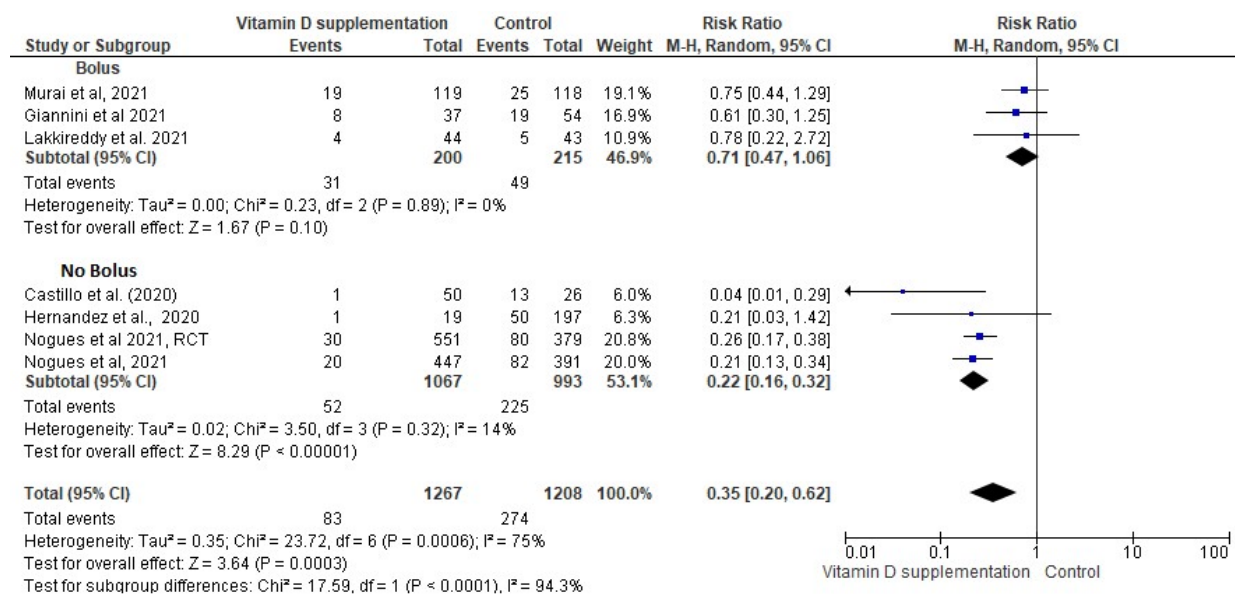

**Figure S10.** Forest plot of studies investigating the effects of supplementation with vitamin D on COVID-19 associated ICU admission rate by vitamin D regimens (daily or weekly without bolus dosing versus a regimen including at least one bolus dose of at least 30,000 IU). Values are presented as risk ratio with 95% CI determined with the use of Mantel-Haenszel fixed-effects models. Heterogeneity was quantified by  $I^2$  at a significance of  $P < 0.10$ .

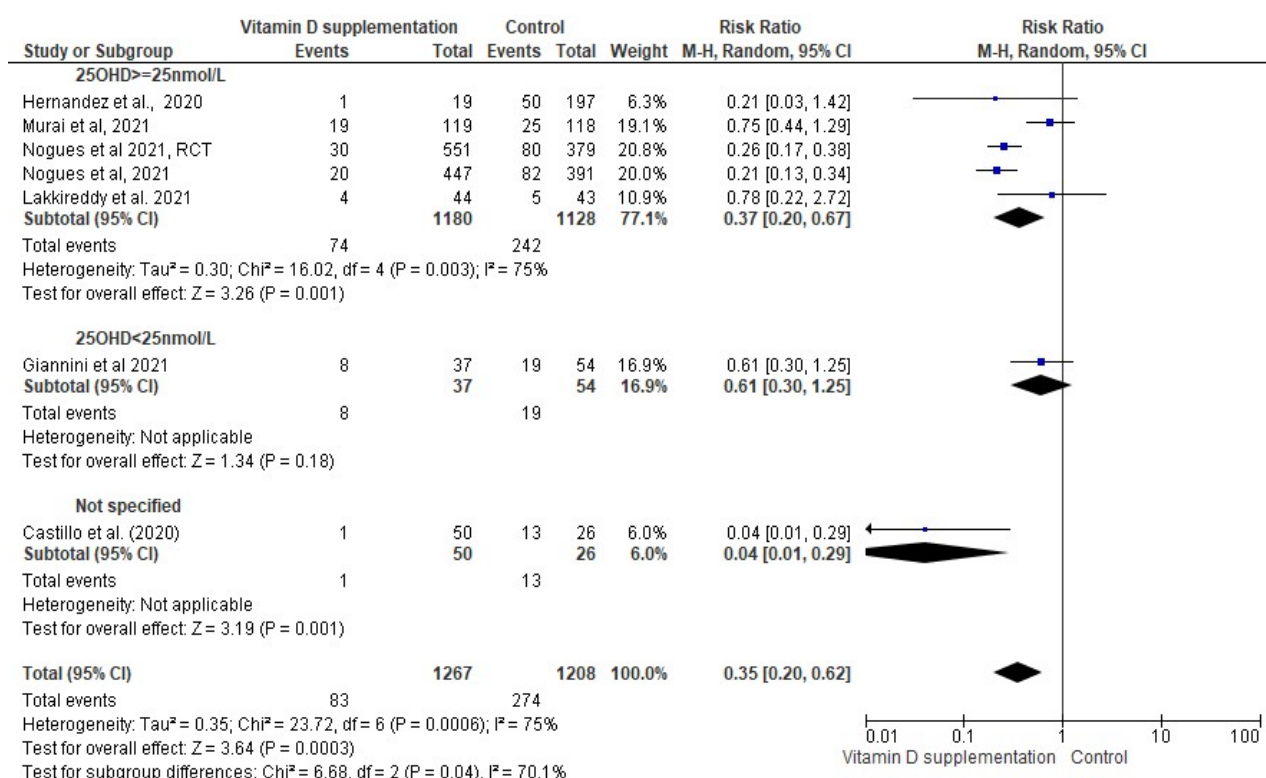

**Figure S11.** Forest plot of studies investigating the effects of supplementation with vitamin D on COVID-19 associated ICU admission rate by baseline vitamin D status (serum 25-hydroxy level (25(OH)D $\geq$  25 nmol/L versus 25(OH)D < 25 nmol/L versus not specified) in tertiary prevention studies. Values are presented as risk ratio with 95% CI determined with the use of Mantel-Haenszel fixed-effects models. Heterogeneity was quantified by I<sup>2</sup> at a significance of P < 0.10.

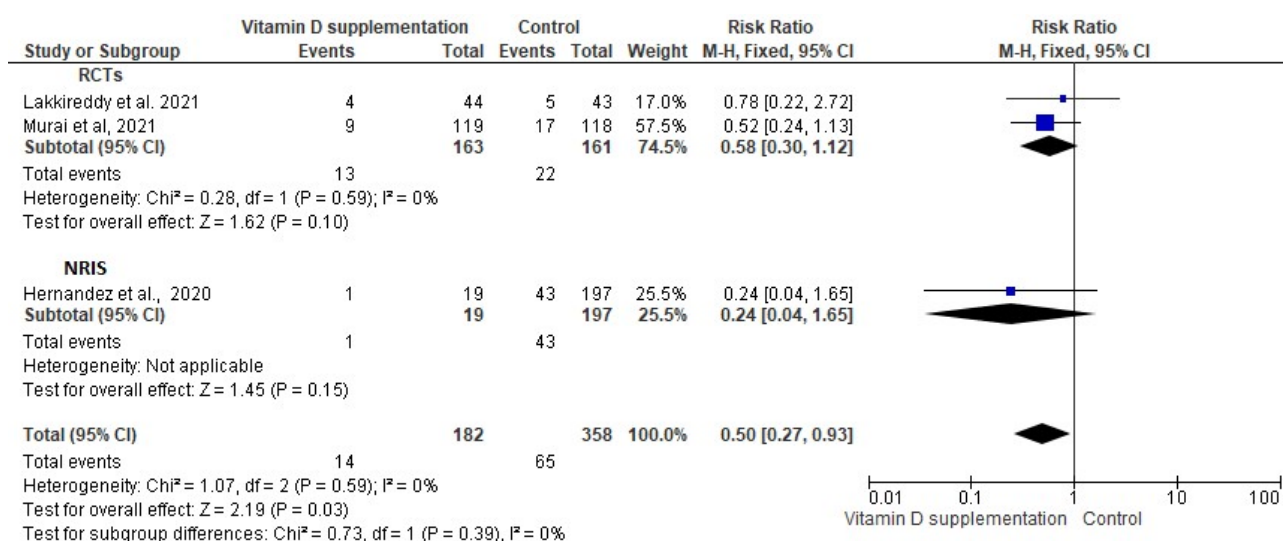

**Figure S12.** Forest plot of studies investigating the effects of supplementation with vitamin D on the need for ventilation in patients with COVID-19 by study design. Values are presented as risk ratio with 95% CI determined with the use of Mantel-Haenszel fixed-effects models. Heterogeneity was quantified by  $I^2$  at a significance of  $P < 0.10$ .

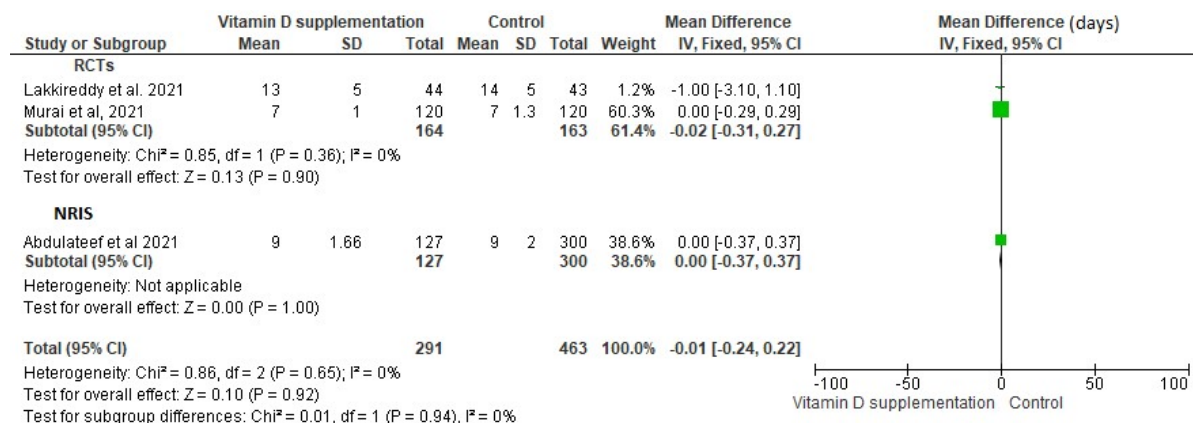

**Figure S13.** Forest plot of studies investigating the effects of supplementation with vitamin D on the length of hospitalization (days) in patients with COVID-19 by study design. Values are presented as mean difference with 95% CI determined with the use of Mantel-Haenszel fixed-effects models. Heterogeneity was quantified by  $I^2$  at a significance of  $P < 0.10$ .
